# Supplementary material for: Identification and mapping of stable QTL with main and epistasis effect on rice grain yield under upland drought stress
Source: PubMed Central journal article supplement (PMC4048250; doi:10.1186/1471-2156-15-63), 2014-05-27
Supplement: 1471-2156-15-63-S1.pdf [file 1471-2156-15-63-S1.pdf]

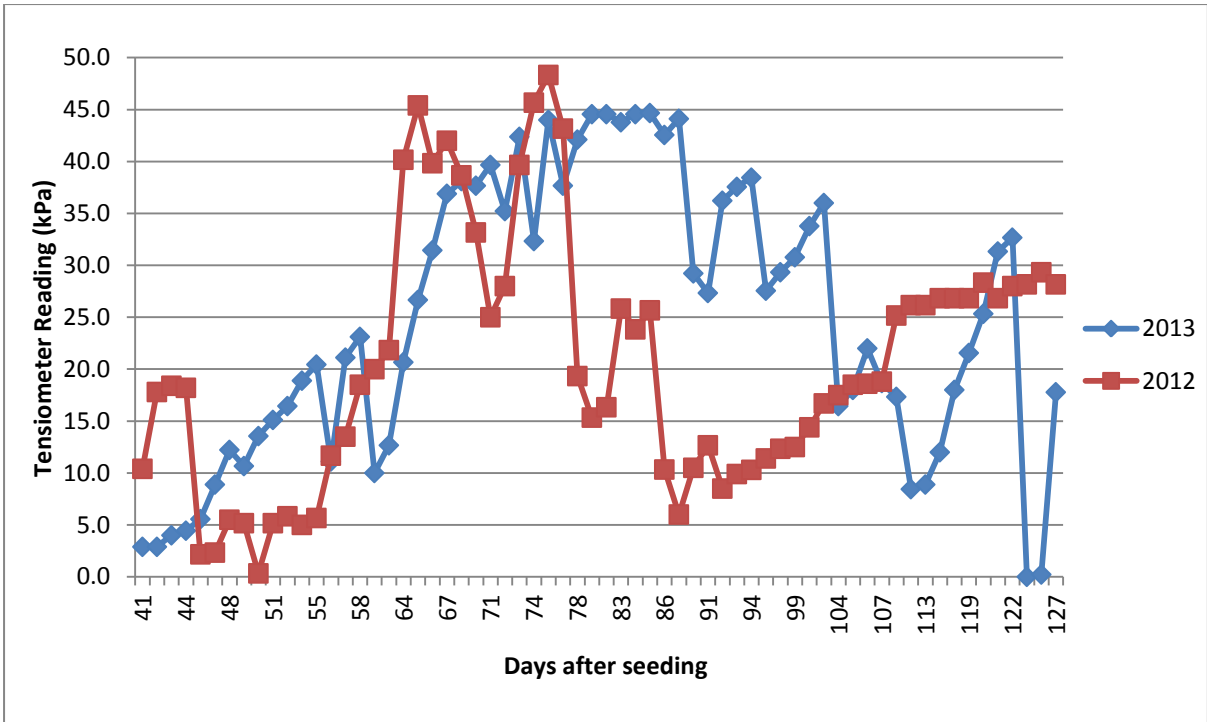

Supplementary Figure 1
